# Supplementary material for: Determination of photostability and photodegradation products of moxifloxacin in the presence of metal ions in solutions and solid phase. Kinetics and identification of photoproducts
Source: Royal Society of Chemistry journal article supplement (doi:10.1039/c1pp05259d), 2011-12-21
Supplement: c1pp05259d.pdf [file c1pp05259d.pdf]

# Determination of photostability and photodegradation products of moxifloxacin in the presence of metal ions in solutions and solid phase. Kinetics and identification of photoproducts.

Urszula Hubicka<sup>a</sup>, Jan Krzek<sup>a\*\*</sup>, Barbara Żuromska<sup>a</sup>, Maria Walczak<sup>b</sup>, Marek Żylewski<sup>c</sup> and Daniel Pawłowski<sup>a</sup>.

<sup>a</sup>Jagiellonian University, Medical College, Pharmaceutical Faculty, Department of Inorganic and Analytical Chemistry, Medyczna 9, 30-688 Krakow, Poland

<sup>b</sup>Jagiellonian University, Medical College, Pharmaceutical Faculty, Department of Pharmacokinetics and Physical Pharmacy, Krakow, Poland.

<sup>c</sup>Jagiellonian University, Medical College, Pharmaceutical Faculty, Department of Organic Chemistry, Krakow, Poland.

## Supporting Information

### 2. Experimental section

#### *Method validation.*

The method was validated for specificity, linearity, precision, recovery, limit of detection and limit of determination according to ICH guidelines.<sup>1</sup> The specificity of the method is its ability to measure analyte response in the presence of potential impurities. In order to evaluate the specificity, 20  $\mu$ L of moxifloxacin solutions without and with ions of studied metals, before and after UVA irradiation were spotted onto TLC plates. For linearity studies aliquots of 0.03  $\mu$ g per band to 2.5  $\mu$ g per band of standard solutions were applied on a TLC plate. Further analytical procedure was as described in 2.5. Determination of linearity was made in three replicate. Linearity was assessed as a relationship between mean peak area and concentration from 0.03 to 1.5  $\mu$ g per band. Linearity was reported as the linear calibration equations and the correlation coefficients (r). For precision, repeatability of sample application and determination of peak area were assessed by making 5 replicates of different amounts of standard solution (0.12, 0.6, 1.2  $\mu$ g per band). Assay accuracy was determined by estimating recovery percentage for moxifloxacin. Known amount of standard substance of

moxifloxacin (80%, 100%, 120%) were added to model solution of this compound. Recovery in percentage value was calculated on the basis of determined content of moxifloxacin to weighed amount. Each level was analyzed in triplicate and a mean value from 9 analyses was taken as a result. In order to assess limit of detection (LOD) and limit of determination (LOQ) decreasing volumes (5, 4, 3, 2, 1 µg per band) of standard solution of the concentration  $6\text{ }\mu\text{g}\cdot\text{mL}^{-1}$  were applied on a TLC sheet. Further analytical procedure was as described in 2.5. Peak area was measured and signal to noise ratio 3:1 was regarded as LOD whereas signal to noise ratio 10:1 was regarded as LOQ.

In a subsequent step, the influence on photodegradation of moxifloxacin concentration in range of  $20\text{ }\mu\text{g}\cdot\text{mL}^{-1}$  to  $100\text{ }\mu\text{g}\cdot\text{mL}^{-1}$ , at constant concentration of metal ions ( $0.025\text{ mol/L}$ ) was tested. Samples were exposed to UVA radiation for 6 h and 72 h in the solid phase and solutions, respectively.

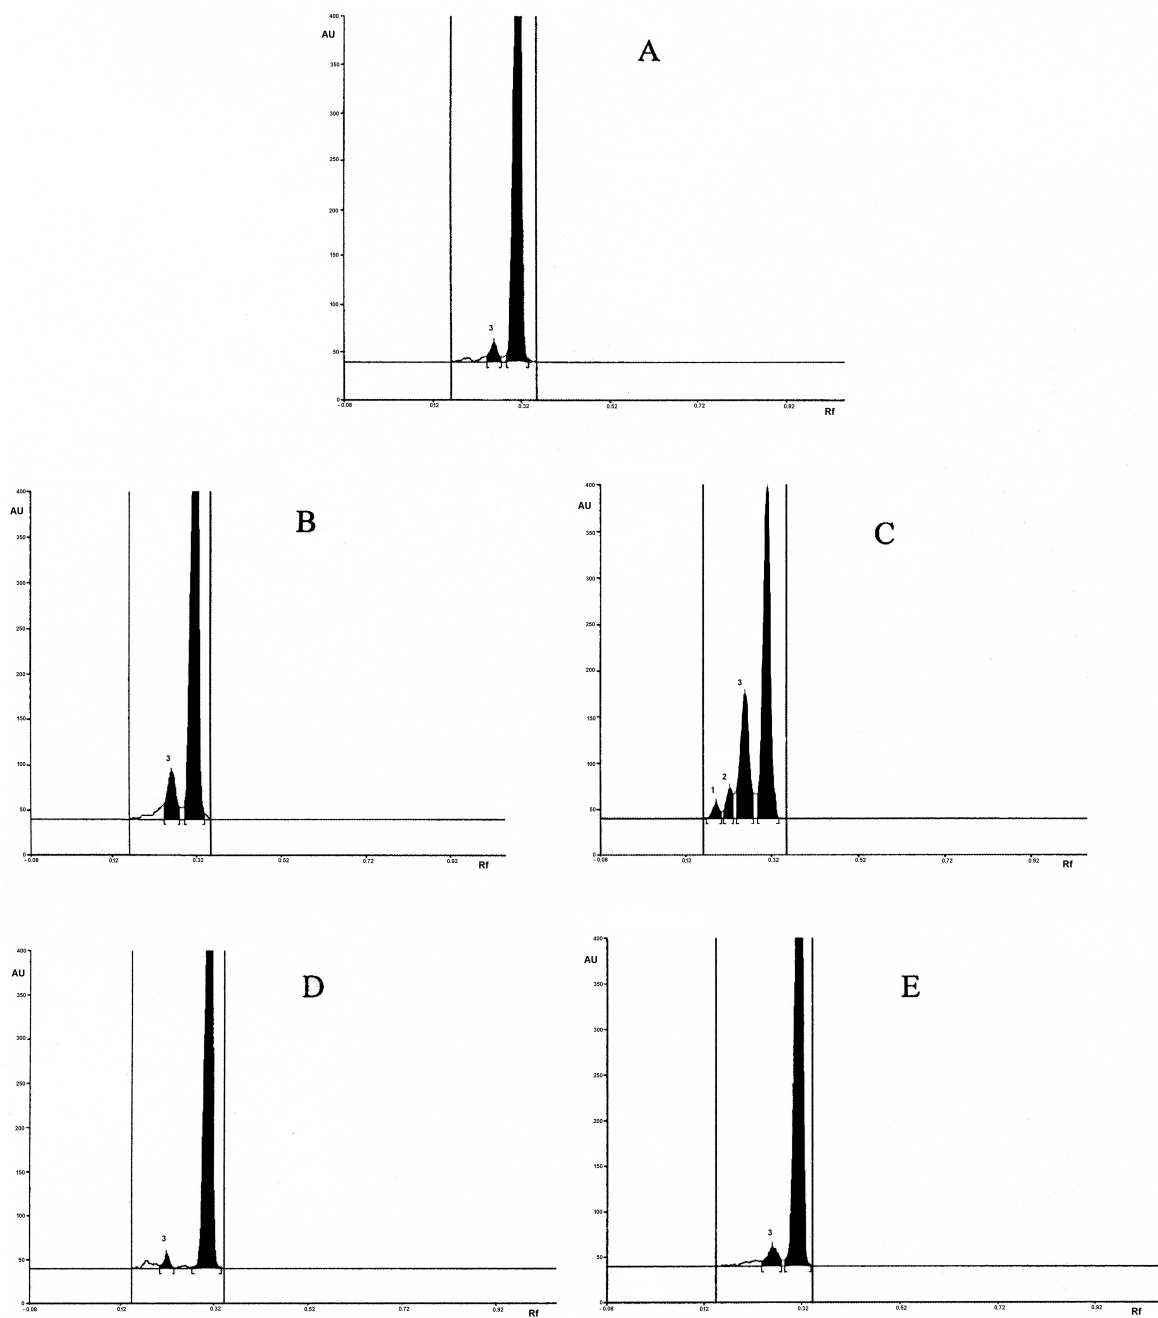

**Figure S 1.** Densitograms of **MOXI** after photodegradation in solutions for 72h: without metal ions (A) and in the presence of: Cu(II) (B), Fe(III) (C), Al(III) (D), Zn(II) (E)

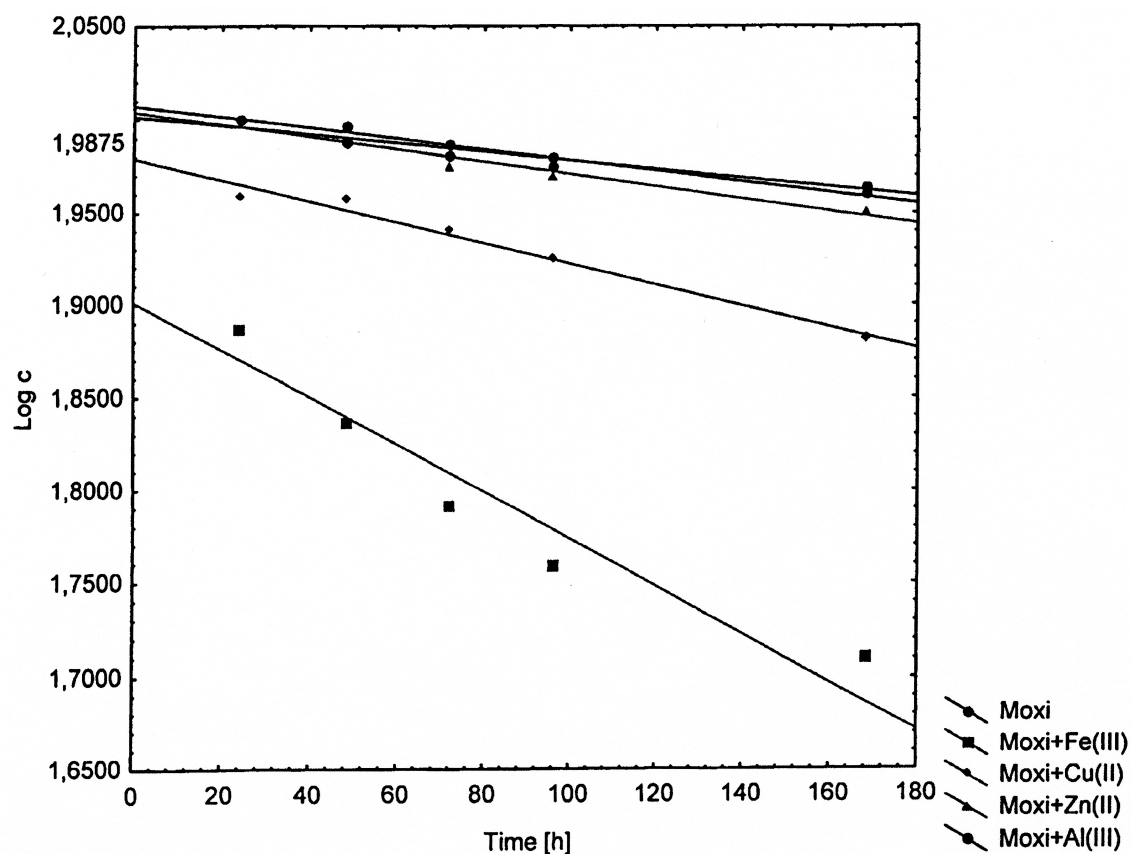

**Figure S 2.** Chart of correlation of  $\log c = f(t)$  for photodegradation of moxifloxacin in solutions with and without the presence of metal ions.

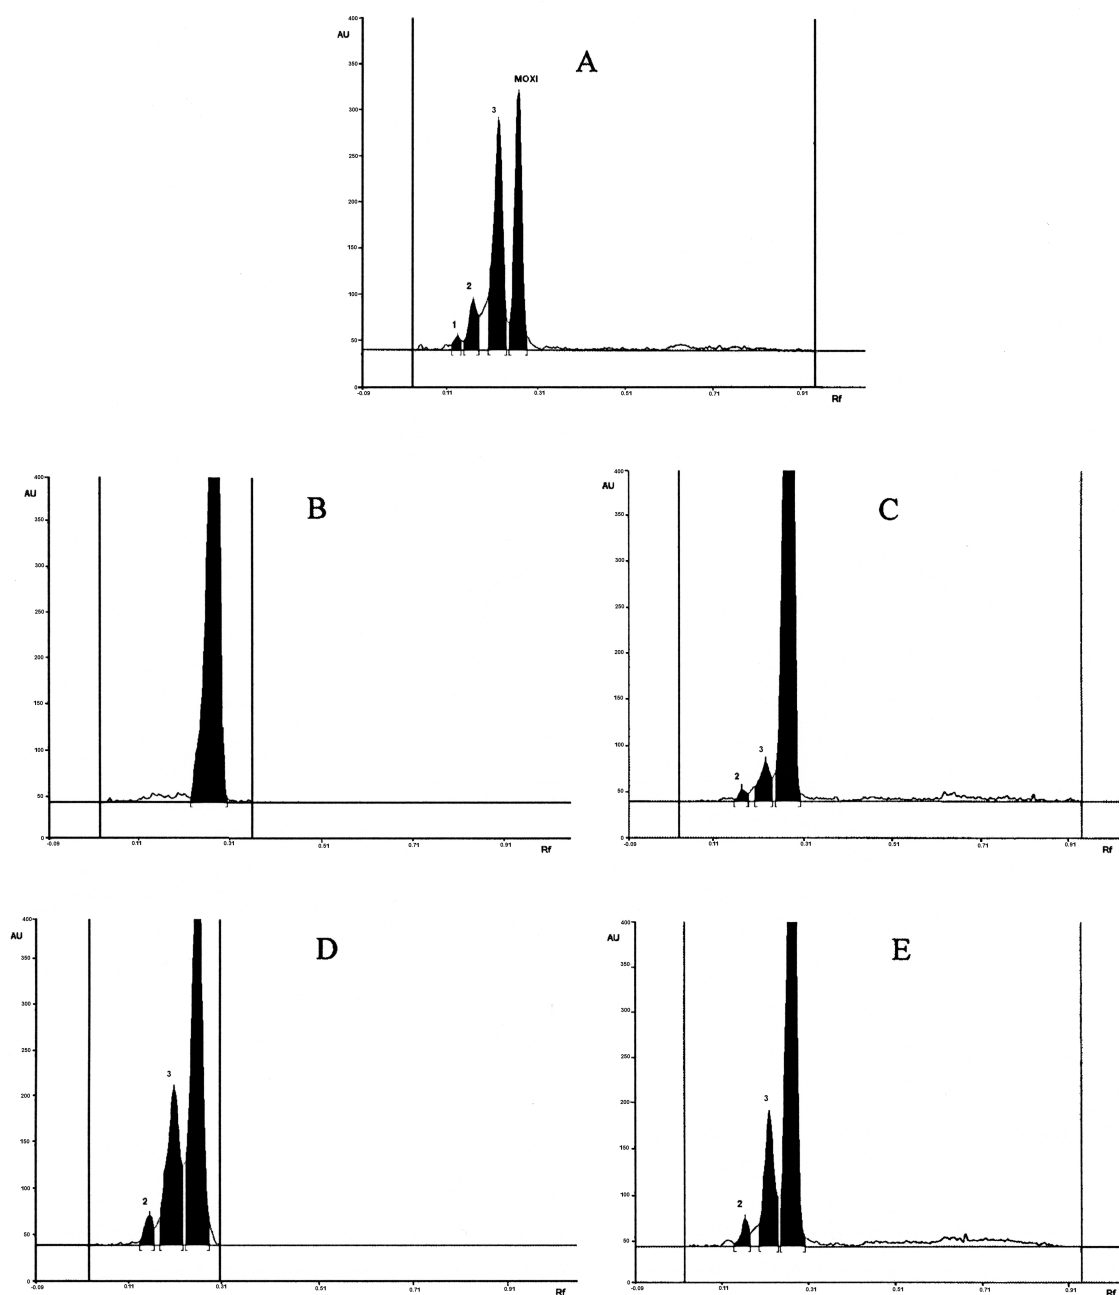

**Figure S 3.** Densitograms of **MOXI** after photodegradation in the solid phase for 15 h: without metal ions (A) and in the presence of: Fe(III) (B), Cu(II) (C), Al(III) (D), Zn(II) (E)

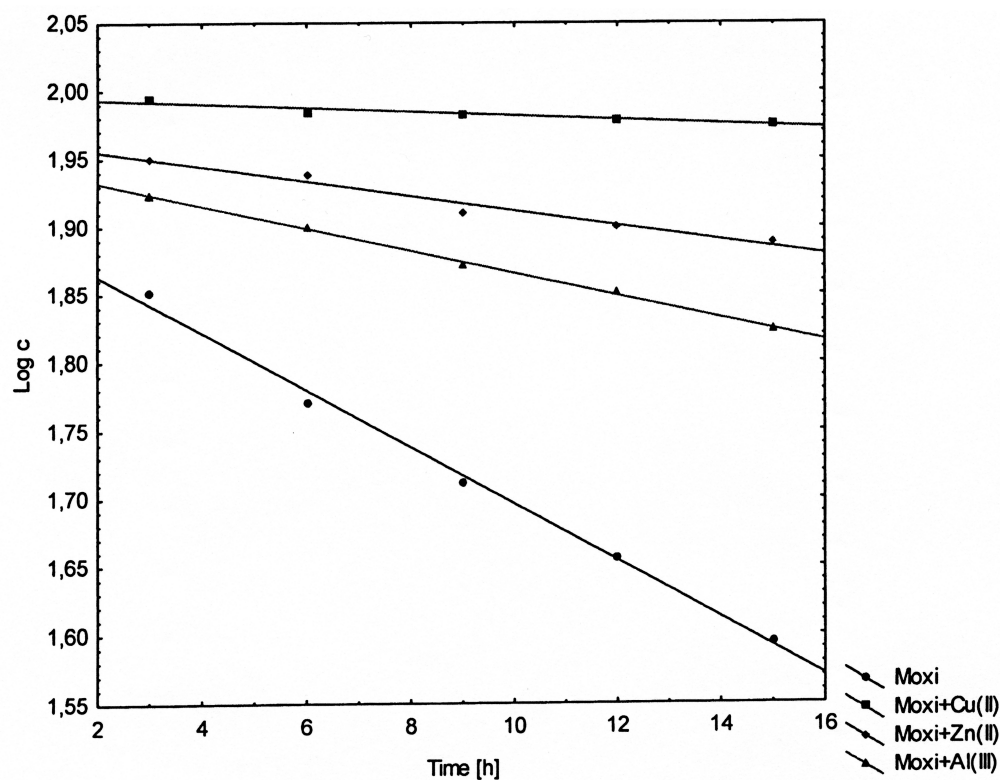

**Figure S 4.** Chart of correlation of  $\log c = f(t)$  for photodegradation of MOXI in solid phase with and without the presence of metal ions.

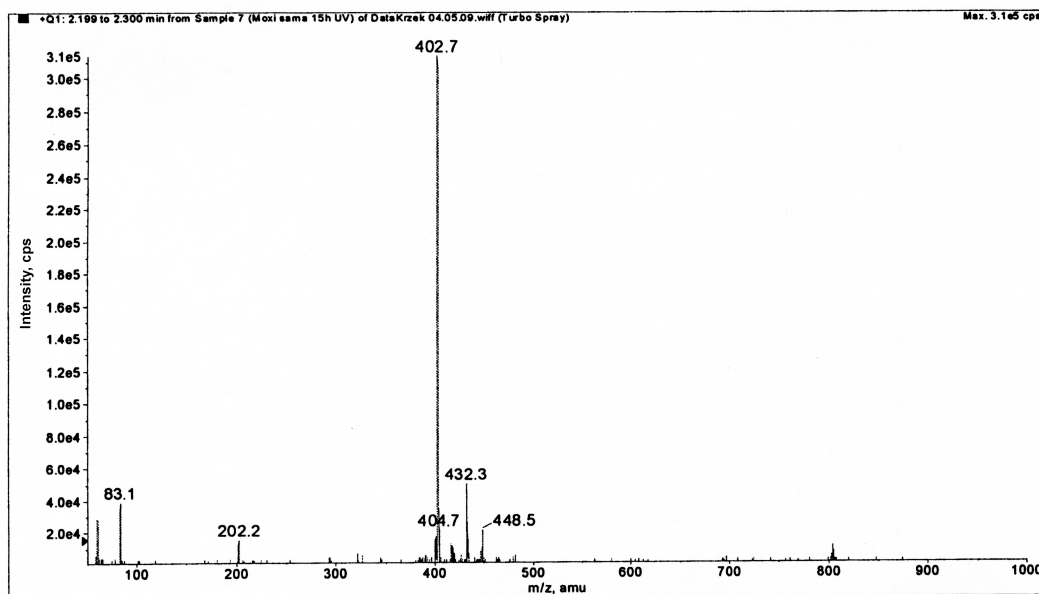

**Figure S 5.** Mass spectrum of MOXI at retention time of 2.21 min.

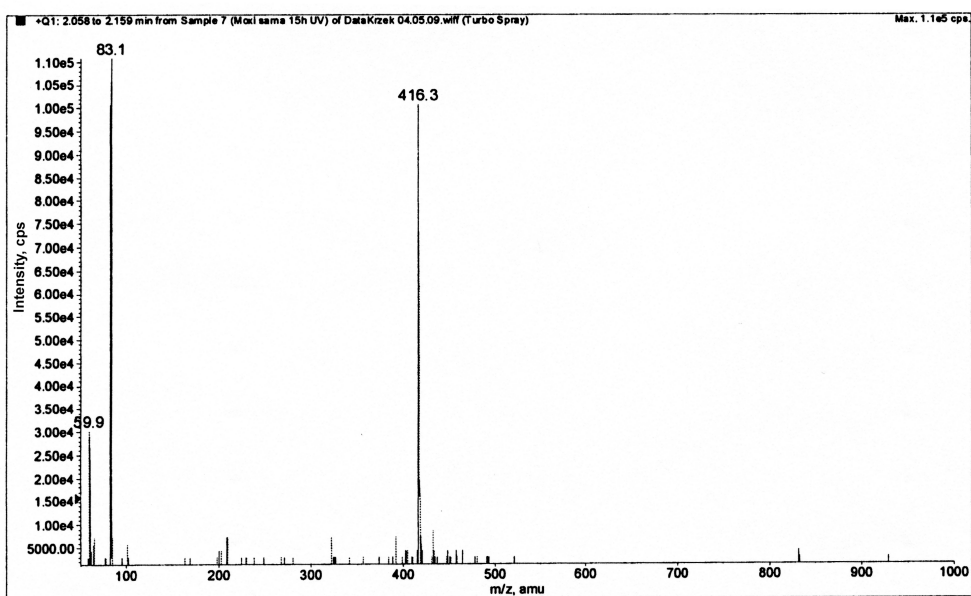

Figure S 6. Mass spectrum of degradation product P-II at retention time of 2.11 min.

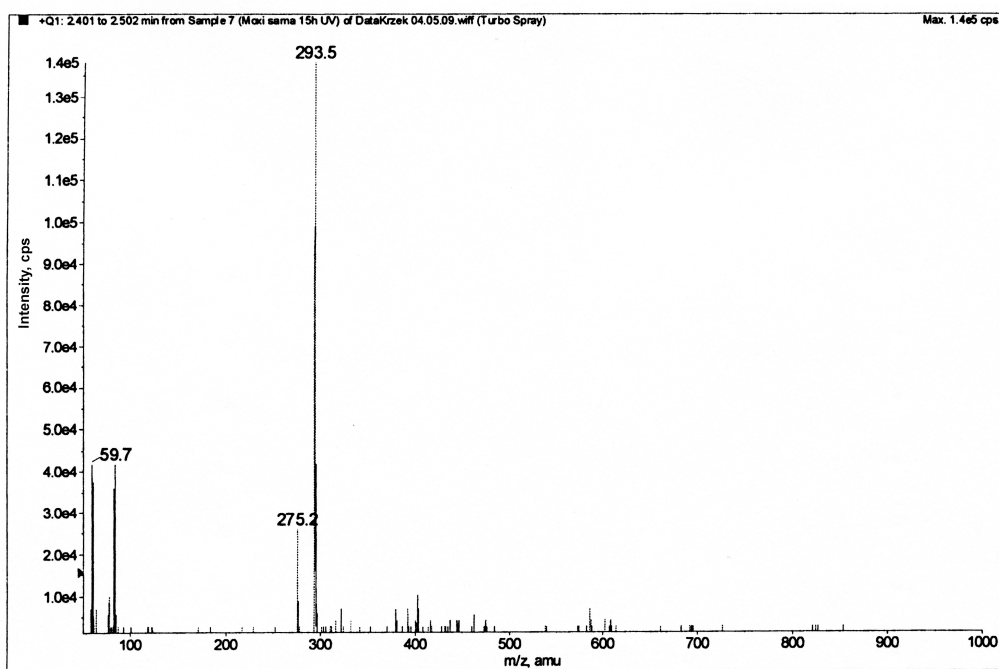

Figure S 7. Mass spectrum of degradation product P-I at retention time of 2.47 min.

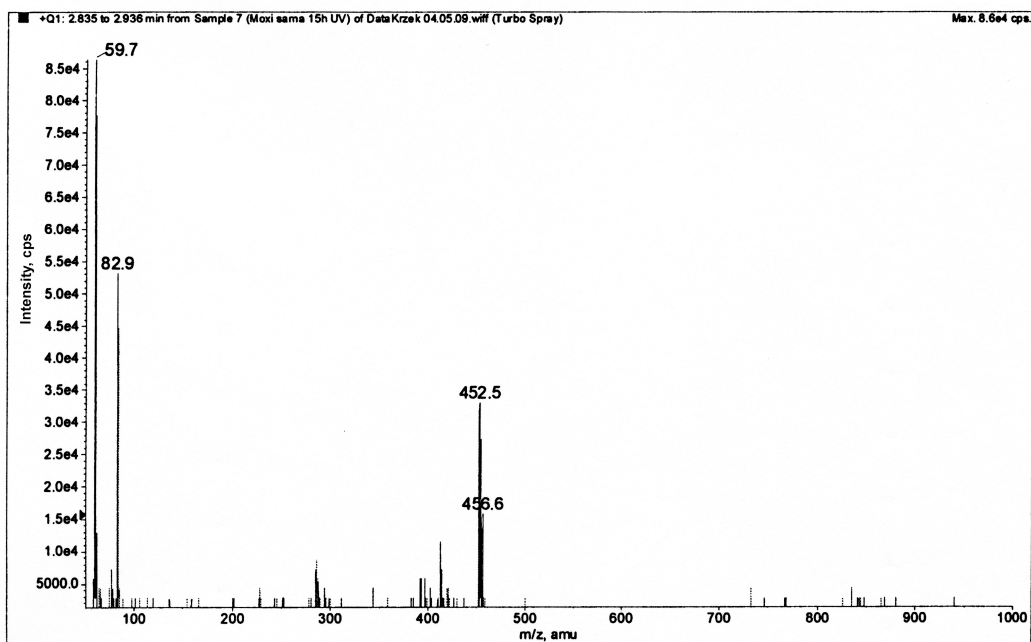

Figure S 8. Mass spectrum of degradation product P-III at retention time of 2.88 min.

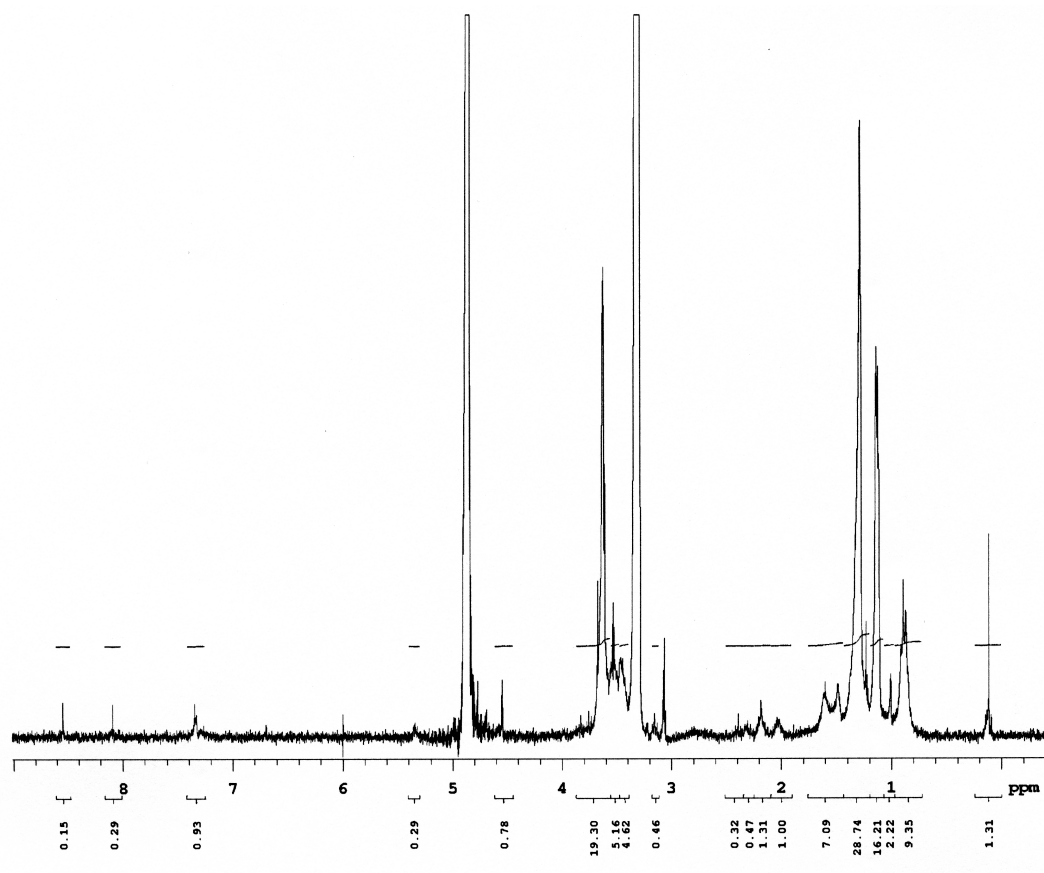

Figure S 9. <sup>1</sup>H NMR spectrum of degradation product P-I.



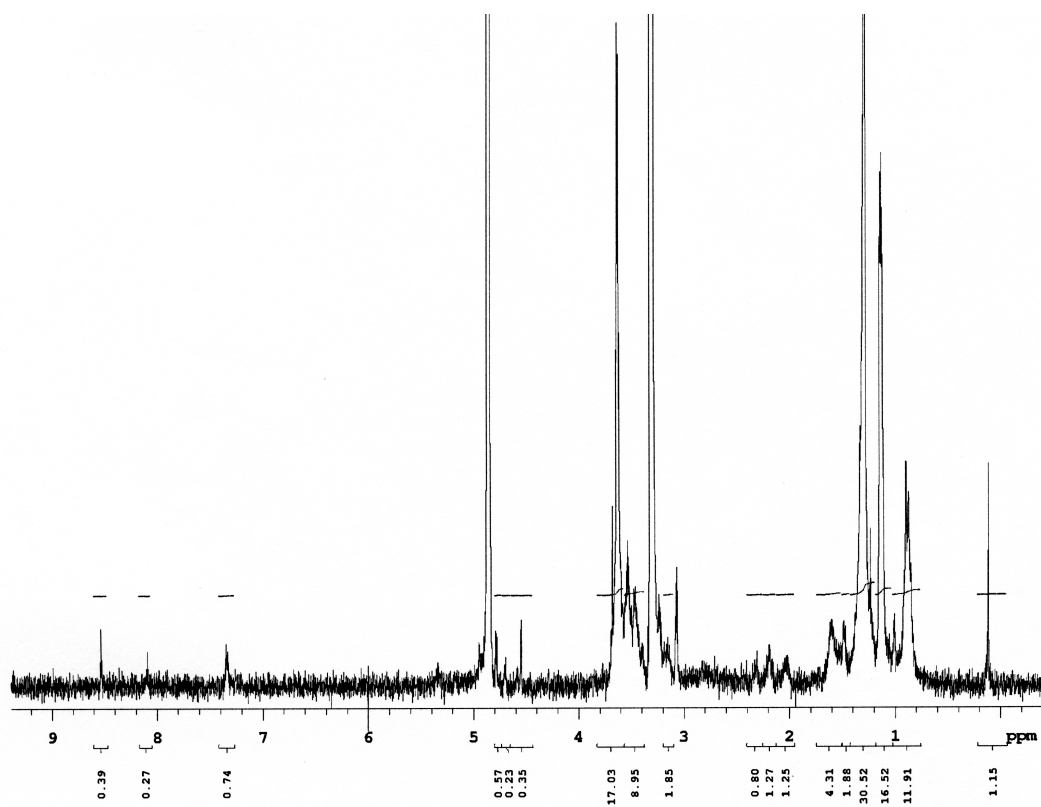

Figure S 10. <sup>1</sup>H NMR spectrum of degradation product P-II.

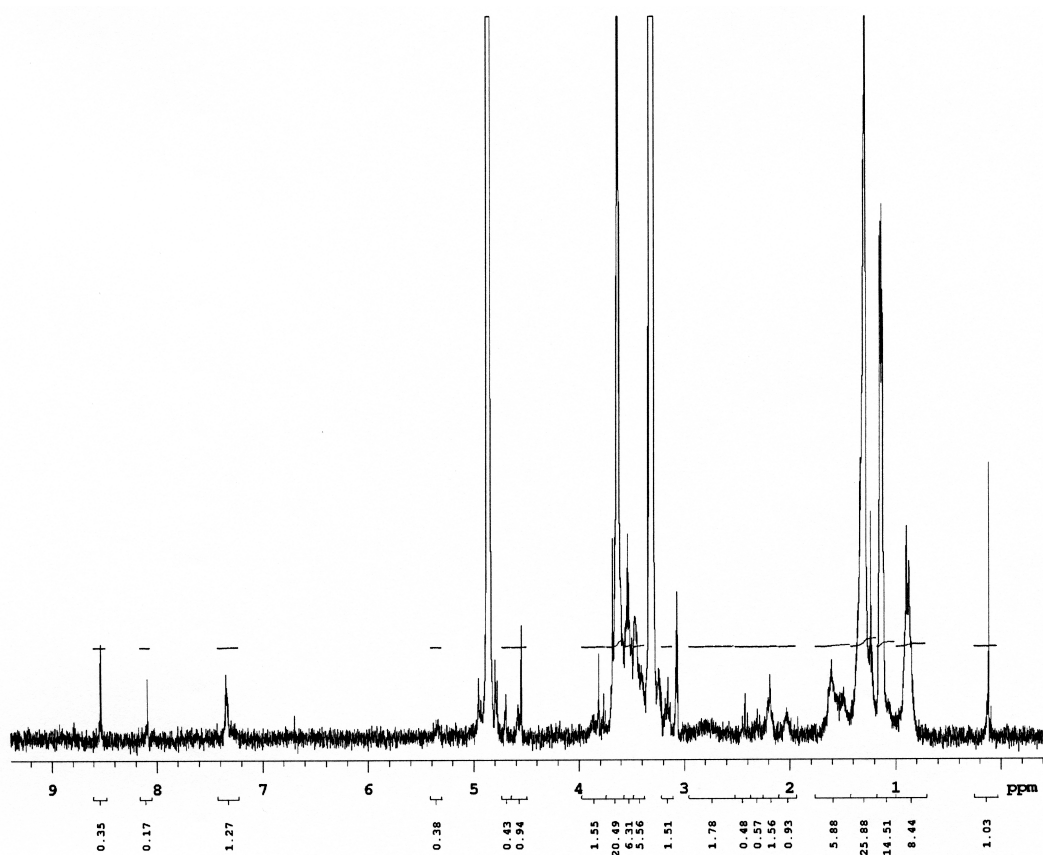

Figure S 11. <sup>1</sup>H NMR spectrum of degradation product P-III.

## References

1. ICH-Q2 (R1) Validation and Analytical Procedures: Text and Methodology, International Conference on Harmonization, Geneva, November 2005, <http://www.ich.org>

**Table S 1.** Validation of the method

| <b>Parameter</b>                                                             | <b>MOXI</b>                                                                                                                          |
|------------------------------------------------------------------------------|--------------------------------------------------------------------------------------------------------------------------------------|
| <b>R<sub>F</sub></b>                                                         | 0.27±0.03                                                                                                                            |
| <b>Limit of detection, [ng/band]</b>                                         | 12                                                                                                                                   |
| <b>Limit of quantitation, [ng/band]</b>                                      | 30                                                                                                                                   |
| <b>Linearity range, [µg/band]</b>                                            | 0.03 – 1.5                                                                                                                           |
| <b>Regression coefficients</b><br><b>P = a c+b±S<sub>e</sub><sup>a</sup></b> | a = 9354.5<br>b = 2766.4±808.2                                                                                                       |
| <b>Standard deviation of the regression coefficients</b>                     | S <sub>a</sub> = 596.0<br>S <sub>b</sub> = 502.1                                                                                     |
| <b>Correlation coefficients, r</b>                                           | r = 0.9900                                                                                                                           |
| <b>Precision</b>                                                             | level 1: x <sub>m</sub> =3882.5 RSD=0.38%<br>level 2: x <sub>m</sub> =9047.4 RSD=0.31%<br>level 3: x <sub>m</sub> =14907.4 RSD=1.07% |
| <b>Indirect precision</b>                                                    | level 1: x <sub>m</sub> =4185.0 RSD=1.08%<br>level 2: x <sub>m</sub> =8959.9 RSD=0.64%<br>level 3: x <sub>m</sub> =14712.2 RSD=0.44% |
| <b>Recovery, [%] n=3</b>                                                     | level 80%: 101.50%<br>level 100%: 101.34%<br>level 120%: 100.34%                                                                     |

<sup>a</sup> P = peak area; c = concentration; a and b = regression coefficients, S<sub>e</sub> = standard error of the estimate, S<sub>a</sub> = standard deviation of the regression coefficient a, S<sub>b</sub> = standard deviation of the regression coefficient b, RSD = relative standard deviation
